# Supplementary material for: A MRI-based nomogram to preoperatively predict histologic grades in stage I endometrial carcinoma
Source: Research Square preprint supplement (doi:10.21203/rs.3.rs-1675298/v1), 2022-06-09
Supplement: Supplementary file 1 [file cca9959a1e17c5c1ec85328d.docx]

**Table 2**. Prediction performance of the selected radiomics features.

| **Feature** | **Cohort** | **Mean ± SD** | | **AUC** | ***P*** |
| --- | --- | --- | --- | --- | --- |
| **Low-grade** | **High-grade** |
| wavelet-LHH_glcm_Idn | Primary traing | 0.878 ± 0.030 | 0.900 ± 0.016 | 0.721 | <0.001 |
| Internal validation | 0.892 ± 0.263 | 0.892 ± 0.278 | 0.424 | 0.834 |
| External validation | 0.888 ± 0.285 | 0.858 ± 0.032 | 0.741 | 0.030 |
| wavelet-HLL_glrlm_LongRunHighGrayLevelEmphasis | Primary traing | 35.300 ± 19.217 | 56.129 ± 21.484 | 0.750 | <0.001 |
| Internal validation | 42.60 ± 38.374 | 52.787 ± 28.315 | 0.631 | 0.007 |
| External validation | 63.954 ± 27.822 | 53.360 ± 19.548 | 0.571 | 0.388 |
| log-sigma-3-0-mm-3D_glcm_SumEntropy | Primary traing | 2.490 ± 0.464 | 0.431 ± 1.056 | 0.756 | <0.001 |
| Internal validation | 2.652 ± 0.538 | 2.912 ± 0.432 | 0.621 | 0.025 |
| External validation | 3.253 ± 0.418 | 3.099 ± 0.437 | 0.608 | 0.190 |

SD, standard deviation.
